# Supplementary material for: Physical Activity and Sedentary Behavior among Young Adolescents in 68 LMICs, and Their Relationships with National Economic Development
Source: PubMed Central journal article supplement (PMC7660305; doi:10.3390/ijerph17217752), 2020-10-23
Supplement: ijerph-17-07752-s001.pdf [file ijerph-17-07752-s001.pdf]

**Table S1.** Characteristics of young adolescents aged 12–15 years in the Global School–Based Student Health Survey across countries, 2009–2016.

| Country               | Survey Years | Sample Size | Age, Years, Mean (SE) | Boys, % | Mean Days/Week of Physical Activity, Mean (SE) | Mean Hours/Day of Sedentary Behavior, Mean (SE) | Recommended Sufficient Physical Activity,% | Recommended Low Sedentary Time,% |
|-----------------------|--------------|-------------|-----------------------|---------|------------------------------------------------|-------------------------------------------------|--------------------------------------------|----------------------------------|
| <b>Africa</b>         |              |             |                       |         |                                                |                                                 |                                            |                                  |
| Algeria               | 2011         | 3410        | 13.63 (0.05)          | 45.6    | 2.49 (0.06)                                    | 2.06 (0.07)                                     | 14.9                                       | 73.2                             |
| Benin                 | 2016         | 698         | 14.22 (0.07)          | 65.9    | 3.44 (0.24)                                    | 2.12 (0.16)                                     | 28.3                                       | 74.8                             |
| Ghana                 | 2012         | 1309        | 13.86 (0.09)          | 48.3    | 1.96 (0.13)                                    | 1.67 (0.07)                                     | 10.2                                       | 81.0                             |
| Mauritania            | 2010         | 1199        | 14.17 (0.05)          | 53.0    | 1.79 (0.14)                                    | 2.73 (0.14)                                     | 10.9                                       | 60.8                             |
| Mauritius             | 2011         | 3032        | 13.83 (0.06)          | 48.7    | 3.10 (0.14)                                    | 2.63 (0.09)                                     | 19.2                                       | 60.9                             |
| Mozambique            | 2015         | 622         | 14.13 (0.15)          | 50.2    | 2.22 (0.22)                                    | 2.68 (0.17)                                     | 10.8                                       | 57.9                             |
| Namibia               | 2013         | 1864        | 14.09 (0.08)          | 42.5    | 1.95 (0.10)                                    | 2.77 (0.08)                                     | 14.2                                       | 63.1                             |
| Seychelles            | 2015         | 1921        | 13.51 (0.12)          | 47.6    | 2.54 (0.10)                                    | 3.35 (0.09)                                     | 17.5                                       | 51.0                             |
| Tanzania              | 2014         | 2499        | 13.63 (0.11)          | 47.0    | 2.76 (0.12)                                    | 1.71 (0.07)                                     | 20.9                                       | 79.9                             |
| <b>America</b>        |              |             |                       |         |                                                |                                                 |                                            |                                  |
| Antigua and Barbuda   | 2009         | 1106        | 13.91 (0.08)          | 51.4    | 2.94 (0.15)                                    | 3.64 (0.13)                                     | 22.8                                       | 45.6                             |
| Argentina             | 2012         | 20416       | 13.93 (0.04)          | 47.6    | 3.07 (0.04)                                    | 3.09 (0.04)                                     | 16.7                                       | 50.0                             |
| Bahamas               | 2013         | 1220        | 13.43 (0.11)          | 46.5    | 2.49 (0.17)                                    | 3.64 (0.09)                                     | 15.4                                       | 45.0                             |
| Barbados              | 2011         | 1419        | 14.10 (0.08)          | 50.3    | 2.77 (0.10)                                    | 3.95 (0.10)                                     | 19.1                                       | 34.9                             |
| Belize                | 2011         | 1501        | 13.56 (0.12)          | 48.1    | 2.73 (0.11)                                    | 2.63 (0.09)                                     | 20.0                                       | 63.3                             |
| Bolivia               | 2012         | 2692        | 14.05 (0.08)          | 49.9    | 2.61 (0.09)                                    | 1.91 (0.07)                                     | 14.0                                       | 75.4                             |
| British Virgin        | 2009         | 1156        | 13.54 (0.03)          | 43.8    | 2.65 (0.08)                                    | 3.85 (0.08)                                     | 18.7                                       | 39.6                             |
| Chile                 | 2013         | 1284        | 13.79 (0.12)          | 48.8    | 3.03 (0.10)                                    | 3.20 (0.10)                                     | 15.6                                       | 47.2                             |
| Costa Rica            | 2009         | 2234        | 13.97 (0.02)          | 49.7    | 2.91 (0.09)                                    | 2.79 (0.07)                                     | 18.1                                       | 55.9                             |
| Curacao               | 2015         | 1352        | 13.95 (0.09)          | 48.4    | 2.26 (0.08)                                    | 3.72 (0.08)                                     | 12.0                                       | 41.3                             |
| El Salvador           | 2013         | 1569        | 13.99 (0.06)          | 51.1    | 2.20 (0.13)                                    | 2.35 (0.13)                                     | 12.6                                       | 64.7                             |
| Guatemala             | 2015         | 3304        | 13.90 (0.08)          | 51.1    | 2.10 (0.12)                                    | 1.83 (0.13)                                     | 11.3                                       | 77.1                             |
| Guyana                | 2010         | 1898        | 14.05 (0.05)          | 48.3    | 2.14 (0.17)                                    | 2.55 (0.11)                                     | 14.9                                       | 64.2                             |
| Honduras              | 2012         | 1417        | 13.57 (0.07)          | 46.0    | 2.25 (0.09)                                    | 2.16 (0.06)                                     | 15.1                                       | 69.6                             |
| Peru                  | 2010         | 2335        | 14.11 (0.04)          | 50.0    | 2.71 (0.09)                                    | 2.07 (0.08)                                     | 15.1                                       | 71.2                             |
| Saint Kitts and Nevis | 2011         | 1423        | 14.08 (0.02)          | 43.2    | 2.57 (0.07)                                    | 3.81 (0.07)                                     | 18.1                                       | 40.8                             |
| Suriname              | 2009         | 1004        | 13.95 (0.07)          | 44.9    | 2.70 (0.13)                                    | 2.64 (0.11)                                     | 19.8                                       | 59.6                             |

|                           |      |       |              |      |             |             |      |      |
|---------------------------|------|-------|--------------|------|-------------|-------------|------|------|
| Trinidad and Tobago       | 2011 | 2219  | 13.59 (0.07) | 49.2 | 2.88 (0.13) | 2.87 (0.07) | 20.5 | 55.9 |
| Uruguay                   | 2012 | 2799  | 14.09 (0.04) | 46.0 | 3.01 (0.08) | 3.32 (0.06) | 16.4 | 41.6 |
| <b>East Mediterranean</b> |      |       |              |      |             |             |      |      |
| Afghanistan               | 2014 | 1399  | 14.06 (0.06) | 53.6 | 2.21 (0.12) | 1.84 (0.14) | 10.0 | 76.6 |
| Bahrain                   | 2016 | 5319  | 13.65 (0.08) | 50.2 | 3.03 (0.09) | 3.66 (0.10) | 21.0 | 43.4 |
| Egypt                     | 2011 | 2279  | 13.51 (0.06) | 49.1 | 2.06 (0.14) | 2.18 (0.13) | 12.9 | 72.6 |
| Iraq                      | 2012 | 1451  | 13.89 (0.07) | 54.6 | 2.13 (0.10) | 1.96 (0.07) | 14.8 | 74.1 |
| Kuwait                    | 2015 | 1803  | 14.06 (0.11) | 50.8 | 2.87 (0.11) | 3.97 (0.17) | 17.1 | 36.8 |
| Lebanon                   | 2011 | 1869  | 13.73 (0.10) | 46.5 | 3.30 (0.08) | 2.93 (0.08) | 23.4 | 52.8 |
| Morocco                   | 2010 | 2319  | 13.66 (0.03) | 52.7 | 2.23 (0.06) | 1.98 (0.06) | 12.7 | 74.2 |
| Oman                      | 2015 | 1616  | 14.19 (0.02) | 43.9 | 2.37 (0.06) | 2.66 (0.06) | 13.3 | 62.3 |
| Pakistan                  | 2009 | 4893  | 14.12 (0.04) | 60.8 | 1.65 (0.19) | 1.11 (0.04) | 11.6 | 91.8 |
| Palestine                 | 2010 | 13161 | 13.79 (0.04) | 48.6 | 2.33 (0.06) | 2.27 (0.04) | 16.3 | 67.2 |
| Qatar                     | 2011 | 1538  | 13.41 (0.08) | 47.0 | 2.09 (0.11) | 3.24 (0.11) | 10.6 | 51.1 |
| Sudan                     | 2012 | 1334  | 14.17 (0.07) | 52.3 | 1.77 (0.11) | 1.65 (0.11) | 7.8  | 80.4 |
| Syria                     | 2010 | 2867  | 13.59 (0.08) | 51.2 | 1.86 (0.10) | 1.86 (0.08) | 11.3 | 74.8 |
| United Arab Emirates      | 2010 | 2190  | 13.97 (0.06) | 39.0 | 2.90 (0.11) | 3.16 (0.10) | 17.3 | 49.0 |
| Yemen                     | 2014 | 1471  | 13.83 (0.07) | 56.1 | 1.93 (0.14) | 1.65 (0.13) | 13.2 | 80.9 |
| <b>Southeast Asia</b>     |      |       |              |      |             |             |      |      |
| Bangladesh                | 2014 | 2618  | 13.95 (0.08) | 63.6 | 4.05 (0.15) | 1.52 (0.09) | 41.4 | 85.0 |
| Indonesia                 | 2015 | 8512  | 13.45 (0.05) | 49.3 | 1.90 (0.07) | 1.91 (0.06) | 12.0 | 75.5 |
| Nepal                     | 2015 | 4438  | 13.76 (0.04) | 48.1 | 1.87 (0.18) | 1.16 (0.05) | 14.7 | 90.2 |
| Thailand                  | 2015 | 4012  | 13.67 (0.06) | 49.0 | 2.38 (0.07) | 3.16 (0.11) | 12.0 | 49.4 |
| Timor-Leste               | 2015 | 1530  | 14.09 (0.06) | 46.1 | 1.63 (0.07) | 1.55 (0.07) | 8.1  | 84.3 |
| <b>Western Pacific</b>    |      |       |              |      |             |             |      |      |
| Brunei Darussalam         | 2014 | 1772  | 13.96 (0.06) | 47.9 | 2.65 (0.07) | 3.27 (0.08) | 11.6 | 45.5 |
| Cambodia                  | 2013 | 1775  | 14.05 (0.07) | 48.4 | 1.42 (0.05) | 1.22 (0.06) | 6.5  | 89.7 |
| Cook                      | 2015 | 360   | 14.21 (0.12) | 48.6 | 3.27 (0.19) | 2.62 (0.12) | 16.1 | 57.9 |
| Fiji                      | 2016 | 1429  | 14.41 (0.04) | 48.3 | 2.92 (0.10) | 2.16 (0.10) | 19.6 | 71.7 |
| French Polynesia          | 2015 | 1798  | 13.69 (0.10) | 48.7 | 3.30 (0.10) | 2.65 (0.08) | 16.8 | 60.5 |
| Kiribati                  | 2011 | 1322  | 14.04 (0.08) | 45.3 | 2.53 (0.08) | 1.46 (0.05) | 17.2 | 85.6 |
| Laos                      | 2015 | 1629  | 14.48 (0.04) | 47.9 | 2.31 (0.08) | 1.65 (0.07) | 16.3 | 80.9 |
| Malaysia                  | 2012 | 16081 | 13.97 (0.02) | 49.5 | 2.57 (0.05) | 2.71 (0.04) | 13.8 | 57.3 |

|                   |      |        |              |      |             |             |      |      |
|-------------------|------|--------|--------------|------|-------------|-------------|------|------|
| Mongolia          | 2013 | 3643   | 13.67 (0.05) | 49.2 | 3.50 (0.06) | 2.56 (0.08) | 26.8 | 60.2 |
| Nauru             | 2011 | 309    | 13.72 (0.06) | 38.5 | 1.55 (0.13) | 2.78 (0.17) | 10.4 | 67.0 |
| Niue              | 2010 | 78     | 13.42 (0.14) | 56.4 | 2.79 (0.28) | 2.35 (0.29) | 12.8 | 71.8 |
| Philippines       | 2015 | 6028   | 13.88 (0.05) | 48.0 | 1.46 (0.09) | 2.16 (0.10) | 7.4  | 69.3 |
| Samoa             | 2011 | 1838   | 14.03 (0.06) | 46.4 | 2.39 (0.06) | 2.61 (0.08) | 12.6 | 62.8 |
| Solomon           | 2011 | 872    | 14.08 (0.07) | 51.9 | 2.73 (0.12) | 2.10 (0.13) | 16.8 | 72.8 |
| Tokelau           | 2014 | 81     | 13.42 (0.05) | 56.8 | 3.03 (0.56) | 2.98 (0.05) | 26.1 | 56.2 |
| Tonga             | 2010 | 1908   | 14.06 (0.07) | 50.5 | 2.40 (0.09) | 2.34 (0.08) | 13.8 | 70.7 |
| Tuvalu            | 2013 | 631    | 13.34 (0.04) | 49.1 | 1.69 (0.10) | 1.54 (0.07) | 11.7 | 84.6 |
| Vanuatu           | 2011 | 832    | 13.45 (0.12) | 49.3 | 3.28 (0.41) | 1.84 (0.13) | 10.6 | 81.2 |
| Vietnam           | 2013 | 1731   | 14.50 (0.04) | 46.8 | 2.20 (0.08) | 2.31 (0.08) | 12.9 | 65.1 |
| Wallis and Futuna | 2015 | 660    | 13.74 (0.14) | 48.7 | 2.66 (0.14) | 2.39 (0.12) | 14.2 | 66.4 |
| <b>Total</b>      |      | 180298 | 13.88 (0.03) | 48.3 | 2.48 (0.06) | 2.48 (0.09) | 15.3 | 64.6 |

---

**Table S2.** Proportion of physical activity  $\geq 1$  h/day and/or sedentary behaviors  $\leq 2$  h/day in adolescents aged 12–15 years by country.

| Country                   | Physical activity $\geq 1$ h per day      |                                        | Physical activity $< 1$ h per day         |                                        |
|---------------------------|-------------------------------------------|----------------------------------------|-------------------------------------------|----------------------------------------|
|                           | Sedentary behaviors $\leq 2$ h per day, % | Sedentary behaviors $> 2$ h per day, % | Sedentary behaviors $\leq 2$ h per day, % | Sedentary behaviors $> 2$ h per day, % |
| <b>Africa</b>             |                                           |                                        |                                           |                                        |
| Algeria                   | 9.6 (8.3–11.1)                            | 5.3 (4.5–6.2)                          | 63.6 (61.2–66.0)                          | 21.5 (18.8–24.5)                       |
| Benin                     | 19.9 (14.2–27.2)                          | 8.4 (5.9–11.7)                         | 54.9 (48.1–61.5)                          | 16.9 (13.1–21.5)                       |
| Ghana                     | 7.7 (6.5–9.1)                             | 2.5 (1.7–3.7)                          | 73.3 (70.3–76.1)                          | 16.5 (14.1–19.2)                       |
| Mauritania                | 6.1 (4.5–8.2)                             | 4.8 (3.3–6.8)                          | 54.7 (49.4–59.9)                          | 34.4 (29.3–40.0)                       |
| Mauritius                 | 11.8 (9.9–14.0)                           | 7.4 (6.1–9.1)                          | 49.1 (46.3–52.0)                          | 31.6 (28.2–35.3)                       |
| Mozambique                | 5.7 (3.3–9.9)                             | 5.1 (2.9–8.7)                          | 52.2 (44.3–60.0)                          | 37.0 (30.9–43.5)                       |
| Namibia                   | 7.5 (6.0–9.4)                             | 6.6 (5.6–7.8)                          | 55.6 (52.6–58.5)                          | 30.2 (27.3–33.3)                       |
| Seychelles                | 8.2 (6.8–9.9)                             | 9.2 (7.8–10.8)                         | 42.7 (40.0–45.6)                          | 39.8 (36.9–42.7)                       |
| Tanzania                  | 15.7 (12.9–19.0)                          | 5.2 (4.0–6.6)                          | 64.2 (59.5–68.6)                          | 14.9 (12.8–17.4)                       |
| Pooled estimates          | 9.5 (7.7–11.3)                            | 6.0 (4.6–7.3)                          | 56.8 (49.7–63.8)                          | 26.9 (20.4–33.3)                       |
| <i>I</i> <sup>2</sup> (%) | 86.4                                      | 88.8                                   | 97.3                                      | 97.2                                   |
| <b>America</b>            |                                           |                                        |                                           |                                        |
| Antigua and Barbuda       | 8.6 (6.6–10.9)                            | 14.2 (11.5–17.5)                       | 37.1 (32.5–41.9)                          | 40.1 (36.4–44.0)                       |
| Argentina                 | 9.0 (8.2–9.9)                             | 7.7 (7.0–8.5)                          | 41.0 (39.6–42.3)                          | 42.3 (40.8–43.8)                       |
| Bahamas                   | 6.2 (4.8–8.1)                             | 9.2 (7.5–11.3)                         | 38.7 (35.0–42.6)                          | 45.8 (42.3–49.4)                       |
| Barbados                  | 6.2 (5.0–7.8)                             | 12.8 (11.0–15.0)                       | 28.7 (25.4–32.2)                          | 52.2 (49.3–55.2)                       |
| Belize                    | 11.7 (9.7–14.1)                           | 8.2 (6.8–9.9)                          | 51.5 (47.3–55.8)                          | 28.5 (25.1–32.2)                       |
| Bolivia                   | 10.5 (8.8–12.5)                           | 3.5 (2.7–4.5)                          | 64.9 (61.8–67.8)                          | 21.2 (18.9–23.6)                       |
| British Virgin            | 6.8 (5.3–8.3)                             | 11.9 (10.0–13.8)                       | 32.8 (30.1–35.5)                          | 48.5 (45.6–51.4)                       |
| Chile                     | 8.6 (7.2–10.2)                            | 7.0 (5.3–9.1)                          | 38.6 (35.0–42.3)                          | 45.9 (41.6–50.1)                       |
| Costa Rica                | 10.5 (9.1–12.1)                           | 7.6 (6.4–8.9)                          | 45.5 (42.0–48.9)                          | 36.5 (33.5–39.5)                       |
| Curacao                   | 4.6 (3.5–5.9)                             | 7.4 (6.3–8.8)                          | 36.7 (33.7–39.9)                          | 51.2 (47.6–54.9)                       |
| El Salvador               | 7.4 (6.0–9.1)                             | 5.2 (3.8–7.1)                          | 57.3 (51.3–63.2)                          | 30.1 (25.8–34.7)                       |
| Guatemala                 | 8.0 (5.7–11.2)                            | 3.3 (2.4–4.4)                          | 69.1 (62.8–74.8)                          | 19.6 (15.2–24.9)                       |
| Guyana                    | 7.9 (6.2–10.1)                            | 7.0 (5.1–9.6)                          | 56.3 (51.0–61.5)                          | 28.8 (25.4–32.4)                       |
| Honduras                  | 9.5 (8.0–11.1)                            | 5.7 (4.6–6.9)                          | 60.1 (57.0–63.2)                          | 24.7 (22.6–27.0)                       |

|                              |                  |                 |                  |                  |
|------------------------------|------------------|-----------------|------------------|------------------|
| Peru                         | 11.0 (9.5–12.7)  | 4.1 (3.3–5.1)   | 60.2 (56.9–63.3) | 24.7 (21.9–27.9) |
| Saint Kitts and Nevis        | 7.2 (5.9–8.5)    | 11.0 (9.4–12.6) | 33.7 (31.2–36.2) | 48.2 (45.6–50.8) |
| Suriname                     | 10.5 (8.9–12.5)  | 9.2 (7.4–11.5)  | 49.0 (43.9–54.2) | 31.2 (27.0–35.7) |
| Trinidad and Tobago          | 10.8 (9.0–12.9)  | 9.7 (7.9–11.8)  | 45.1 (42.2–47.9) | 34.5 (31.2–37.9) |
| Uruguay                      | 8.4 (7.4–9.5)    | 8.1 (6.7–9.6)   | 33.3 (30.7–36.0) | 50.3 (47.7–52.9) |
| Pooled estimates             | 8.5 (7.7–9.4)    | 7.9 (6.7–9.2)   | 46.2 (41.2–51.1) | 37.1 (32.2–42.0) |
| <i>I</i> <sup>2</sup> (%)    | 84.3             | 94.0            | 97.9             | 98.1             |
| <b>Eastern Mediterranean</b> |                  |                 |                  |                  |
| Afghanistan                  | 7.6 (5.6–10.2)   | 2.4 (1.5–3.8)   | 69.0 (62.6–74.8) | 21.0 (15.7–27.4) |
| Bahrain                      | 10.1 (8.3–12.3)  | 10.8 (9.7–12.1) | 33.3 (31.2–35.5) | 45.7 (41.5–50.0) |
| Egypt                        | 7.0 (5.5–8.9)    | 5.9 (3.7–9.2)   | 65.6 (60.0–70.8) | 21.5 (18.0–25.6) |
| Iraq                         | 10.4 (8.2–13.3)  | 4.4 (3.3–5.7)   | 63.7 (60.0–67.2) | 21.5 (18.5–24.8) |
| Kuwait                       | 6.6 (4.8–8.9)    | 10.5 (8.9–12.4) | 30.2 (26.4–34.4) | 52.7 (47.4–57.9) |
| Lebanon                      | 12.6 (10.7–14.9) | 10.8 (8.8–13.1) | 40.1 (36.6–43.8) | 36.4 (32.5–40.6) |
| Morocco                      | 8.5 (7.0–10.2)   | 4.2 (3.6–5.0)   | 65.8 (63.6–67.9) | 21.5 (19.3–23.9) |
| Oman                         | 7.7 (6.4–9.0)    | 5.6 (4.5–6.7)   | 54.6 (52.2–57.0) | 32.1 (29.8–34.4) |
| Pakistan                     | 10.3 (6.1–16.8)  | 1.3 (0.8–2.1)   | 81.6 (76.0–86.1) | 6.9 (5.8–8.1)    |
| Palestine                    | 10.3 (9.4–11.3)  | 6.0 (5.3–6.8)   | 56.9 (55.0–58.7) | 26.8 (25.2–28.5) |
| Qatar                        | 4.7 (3.1–7.1)    | 5.9 (4.5–7.7)   | 46.4 (42.6–50.2) | 43.1 (39.2–47.1) |
| Sudan                        | 5.5 (3.8–8.0)    | 2.2 (1.3–3.9)   | 74.9 (71.0–78.3) | 17.4 (14.5–20.7) |
| Syria                        | 8.1 (6.3–10.3)   | 3.2 (2.5–4.2)   | 66.7 (61.9–71.3) | 22.0 (17.7–26.9) |
| United Arab Emirates         | 8.8 (7.2–10.8)   | 8.5 (7.1–10.1)  | 40.1 (36.8–43.5) | 42.5 (39.2–45.9) |
| Yemen                        | 10.9 (8.3–14.1)  | 2.3 (1.3–4.0)   | 70.0 (64.3–75.2) | 16.8 (13.2–21.1) |
| Pooled estimates             | 8.5 (7.4–9.6)    | 5.5 (4.0–7.0)   | 57.2 (49.8–64.6) | 28.5 (21.6–35.4) |
| <i>I</i> <sup>2</sup> (%)    | 79.0             | 96.5            | 98.8             | 98.9             |
| <b>South-East Asia</b>       |                  |                 |                  |                  |
| Bangladesh                   | 35.0 (30.5–39.8) | 6.3 (4.6–8.6)   | 50.0 (45.2–54.8) | 8.6 (6.2–12.0)   |
| Indonesia                    | 8.5 (7.2–10.0)   | 3.5 (3.0–4.1)   | 67.0 (64.2–69.8) | 21.0 (18.8–23.4) |
| Nepal                        | 13.6 (9.5–19.0)  | 1.1 (0.7–1.6)   | 76.6 (71.1–81.3) | 8.8 (6.9–11.1)   |
| Thailand                     | 5.9 (4.7–7.4)    | 6.1 (5.0–7.3)   | 43.5 (39.3–47.8) | 44.5 (40.1–49.1) |
| Timor-Leste                  | 6.3 (4.8–8.2)    | 1.8 (1.2–2.6)   | 78.1 (75.0–80.9) | 13.9 (11.5–16.6) |
| Pooled estimates             | 13.3 (7.9–18.8)  | 3.6 (1.9–5.4)   | 63.1 (50.4–75.7) | 19.2 (9.8–28.6)  |

| <i>I</i> <sup>2</sup> (%) | 97.2             | 96.3             | 98.2             | 98.3             |
|---------------------------|------------------|------------------|------------------|------------------|
| <b>Western Pacific</b>    |                  |                  |                  |                  |
| Brunei Darussalam         | 5.7 (4.7–6.9)    | 5.9 (4.7–7.4)    | 39.9 (36.9–42.8) | 48.5 (45.4–51.6) |
| Cambodia                  | 5.7 (4.3–7.6)    | 0.8 (0.4–1.5)    | 84.0 (79.7–87.5) | 9.5 (7.2–12.5)   |
| Cook                      | 10.4 (7.1–14.9)  | 5.8 (3.4–9.6)    | 47.6 (42.7–52.5) | 36.3 (31.4–41.5) |
| Fiji                      | 13.6 (11.8–15.6) | 6.0 (4.4–8.2)    | 58.1 (54.8–61.3) | 22.3 (19.1–25.8) |
| French Polynesia          | 10.0 (8.6–11.6)  | 6.9 (5.9–8.0)    | 50.6 (47.9–53.3) | 32.6 (29.8–35.5) |
| Kiribati                  | 14.1 (12.4–16.0) | 3.0 (2.3–4.0)    | 71.4 (68.5–74.2) | 11.4 (9.6–13.4)  |
| Laos                      | 12.4 (10.4–14.6) | 3.9 (3.0–5.1)    | 68.5 (64.9–72.0) | 15.1 (12.5–18.2) |
| Malaysia                  | 7.8 (7.1–8.5)    | 6.0 (5.4–6.6)    | 49.6 (47.8–51.3) | 36.7 (35.0–38.4) |
| Mongolia                  | 15.5 (14.3–16.9) | 11.3 (10.2–12.5) | 44.6 (41.6–47.8) | 28.5 (25.2–32.1) |
| Nauru                     | 4.9 (2.5–7.3)    | 5.5 (3.0–8.0)    | 62.1 (56.7–67.5) | 27.5 (22.5–32.5) |
| Niue                      | 10.3 (3.6–17.0)  | 2.6 (0–6.1)      | 61.5 (50.7–72.3) | 25.6 (15.9–35.3) |
| Philippines               | 3.4 (2.8–4.1)    | 4.0 (2.9–5.4)    | 65.9 (61.9–69.7) | 26.7 (24.0–29.7) |
| Samoa                     | 8.0 (6.5–9.9)    | 4.5 (3.7–5.6)    | 54.8 (51.7–57.9) | 32.6 (30.0–35.4) |
| Solomon                   | 11.1 (9.5–13.1)  | 5.6 (3.5–9.1)    | 61.7 (56.7–66.5) | 21.5 (18.8–24.6) |
| Tokelau                   | 13.5 (5.8–28.3)  | 12.6 (7.9–19.4)  | 42.6 (27.3–59.5) | 31.3 (25.7–37.5) |
| Tonga                     | 8.9 (7.4–10.6)   | 4.9 (3.9–6.1)    | 61.9 (59.2–64.4) | 24.4 (22.0–26.9) |
| Tuvalu                    | 8.6 (6.4–10.8)   | 3.2 (1.8–4.6)    | 76.1 (72.8–79.4) | 12.2 (9.6–14.8)  |
| Vanuatu                   | 7.6 (4.9–11.6)   | 3.0 (1.8–4.9)    | 73.6 (67.3–79.0) | 15.8 (12.4–19.9) |
| Vietnam                   | 8.6 (7.0–10.4)   | 4.3 (3.4–5.6)    | 56.5 (52.3–60.6) | 30.6 (26.9–34.5) |
| Wallis and Futuna         | 8.7 (6.2–12.1)   | 5.5 (3.8–7.9)    | 57.7 (52.6–62.6) | 28.1 (23.8–33.0) |
| Pooled estimates          | 9.3 (7.5–11.0)   | 5.1 (3.9–6.2)    | 59.7 (54.5–64.9) | 25.8 (20.9–30.7) |
| <i>I</i> <sup>2</sup> (%) | 96.1             | 94.9             | 97.7             | 98.1             |
| <b>Total</b>              |                  |                  |                  |                  |
| Pooled estimates          | 9.1 (8.4–9.8)    | 6.0 (5.3–6.7)    | 55.2 (51.9–58.4) | 29.2 (26.1–32.4) |
| <i>I</i> <sup>2</sup> (%) | 92.5             | 96.1             | 98.5             | 98.8             |
